# Supplementary material for: Effect of the C-terminal amino acid of the peptide on the structure and mechanical properties of alginate–peptide hydrogels across length-scales
Source: Royal Society of Chemistry journal article supplement (doi:10.1039/d0sm00329h), 2020-01-01
Supplement: d0sm00329h1.pdf [file d0sm00329h1.pdf]

# Supporting Information

To

Effect of peptide C-terminal amino acid on the structure and  
mechanical properties alginate-peptide hydrogels across length-scales

Guy Ochbaum<sup>a, †</sup>, Einat Chetrit<sup>a, †</sup>, Ronen Berkovich<sup>a, b\*</sup> and Ronit Bitton<sup>a, b\*\*</sup>

<sup>a</sup> Department of Chemical Engineering, Ben-Gurion University of the Negev, Beer-Sheva, 8410501, Israel.

<sup>b</sup> Ilze Kats Institute for Nanoscale Science and Technology, Ben-Gurion University of the Negev, Beer-Sheva, 8410501, Israel.

## Rheology of alginate/peptide hydrogels:

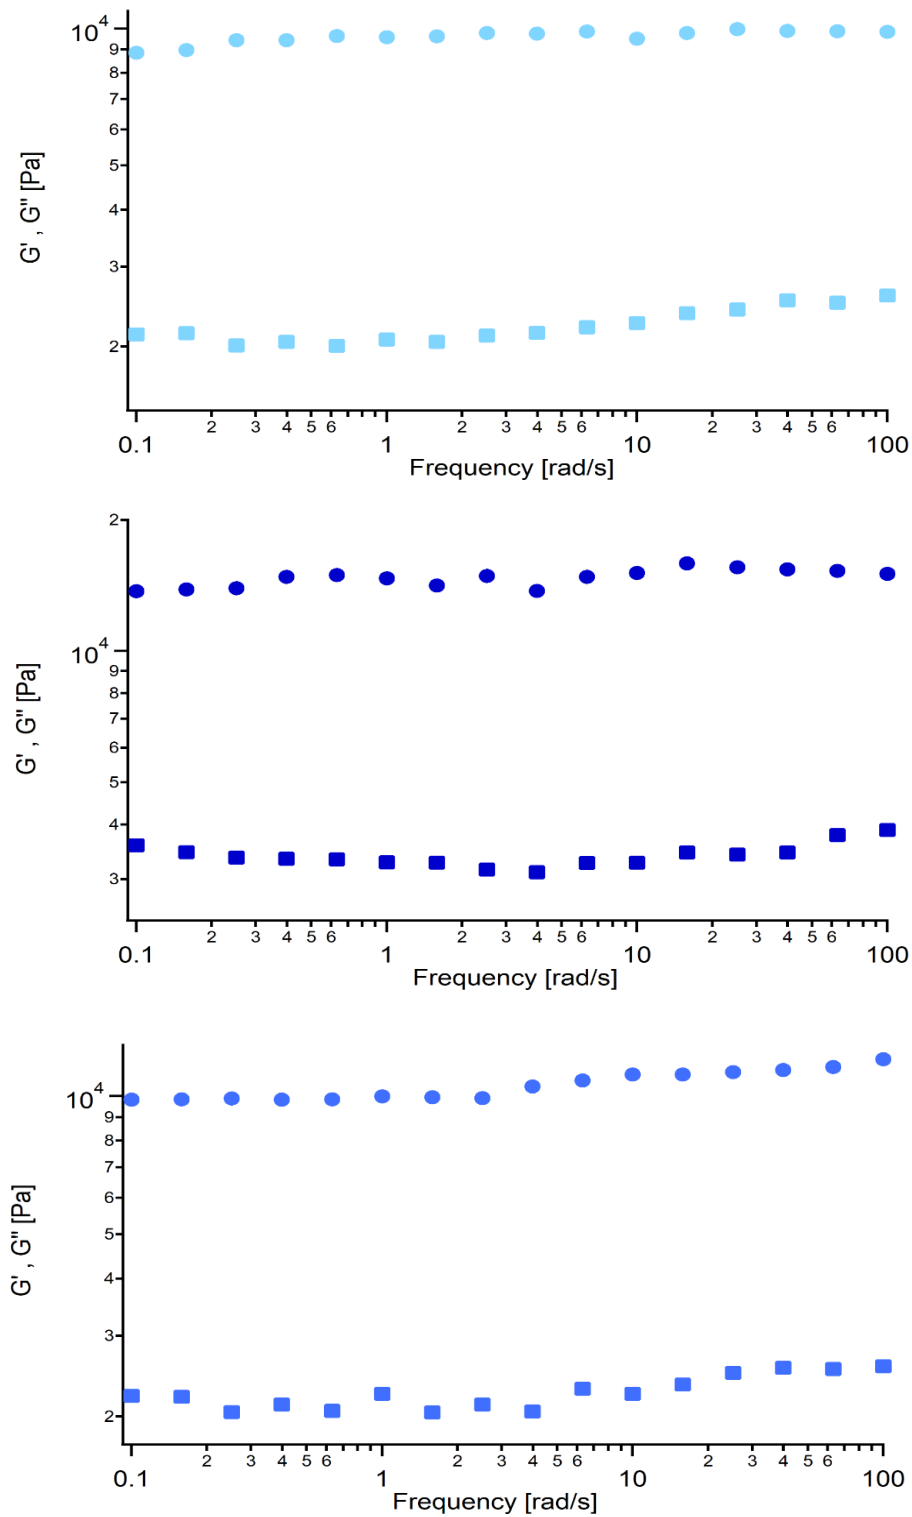

**Figure 1.** Frequency sweep experiments curves of alginate gels in water. A. alginate-A<sub>6</sub>KRGDS (■). B. alginate-V<sub>6</sub>KRGDS (◆). C. alginate-G<sub>6</sub>KRGDS (▲).  $G'$  (●),  $G''$  (■).

## SAXS of alginate-peptide hydrogels

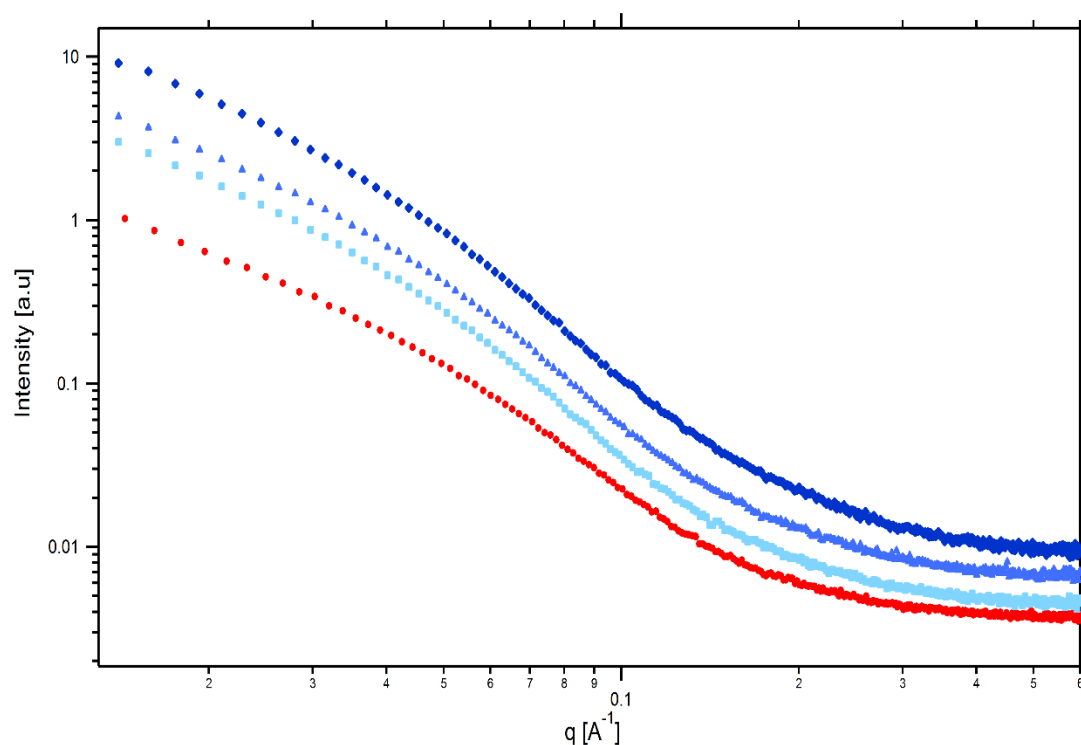

**Figure S2.** Small angle scattering curves of 1% wt. alginate gels in water. Alginate (●), alginate- $A_6$ KRGDS (■), alginate- $V_6$ KRGDS (◆) and alginate- $G_6$ KRGDS (▲). The curves are shifted for better visualization.

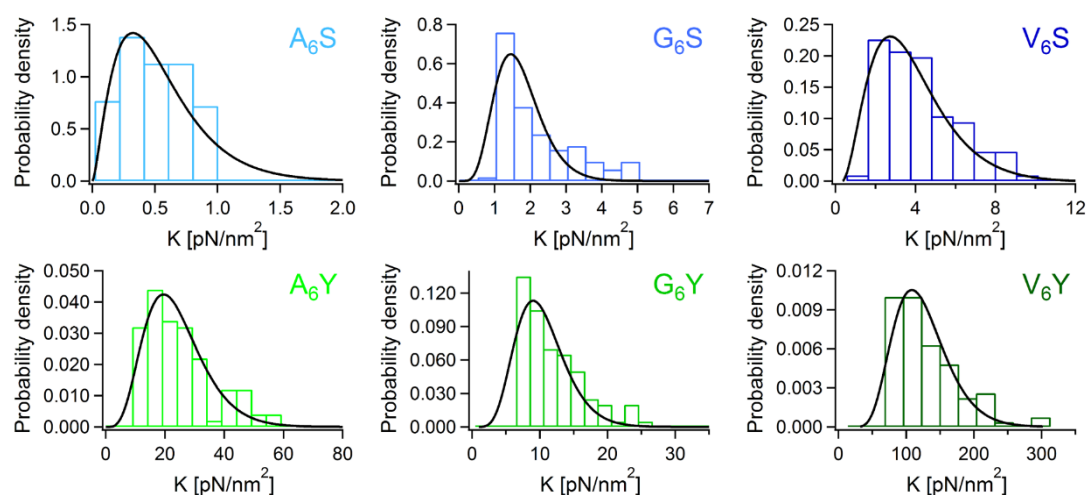

**Figure S3.** Local stiffness modulus probability distribution functions from nanoindentation measurements fitted with Gamma distribution.

Table S1: Local stiffness moduli (in [pN/nm<sup>2</sup>], as obtained from the fitting), with their corresponding  $G'$  values, estimated for each hydrogel. The values are represented as mean  $\pm$  standard deviation.

|                      | $K$ [pN/nm <sup>2</sup> ] | $G'$ [Pa]          |
|----------------------|---------------------------|--------------------|
| Alginate             | $0.17 \pm 0.08$           | $1700 \pm 100$     |
| A <sub>6</sub> KRGDS | $0.5 \pm 0.3$             | $9300 \pm 700$     |
| A <sub>6</sub> KRGDY | $24 \pm 10$               | $79000 \pm 7000$   |
| G <sub>6</sub> KRGDS | $1.9 \pm 0.9$             | $11400 \pm 1000$   |
| G <sub>6</sub> KRGDY | $11 \pm 4$                | $22000 \pm 2000$   |
| V <sub>6</sub> KRGDS | $4 \pm 1$                 | $15200 \pm 1000$   |
| V <sub>6</sub> KRGDY | $105 \pm 40$              | $120000 \pm 10000$ |

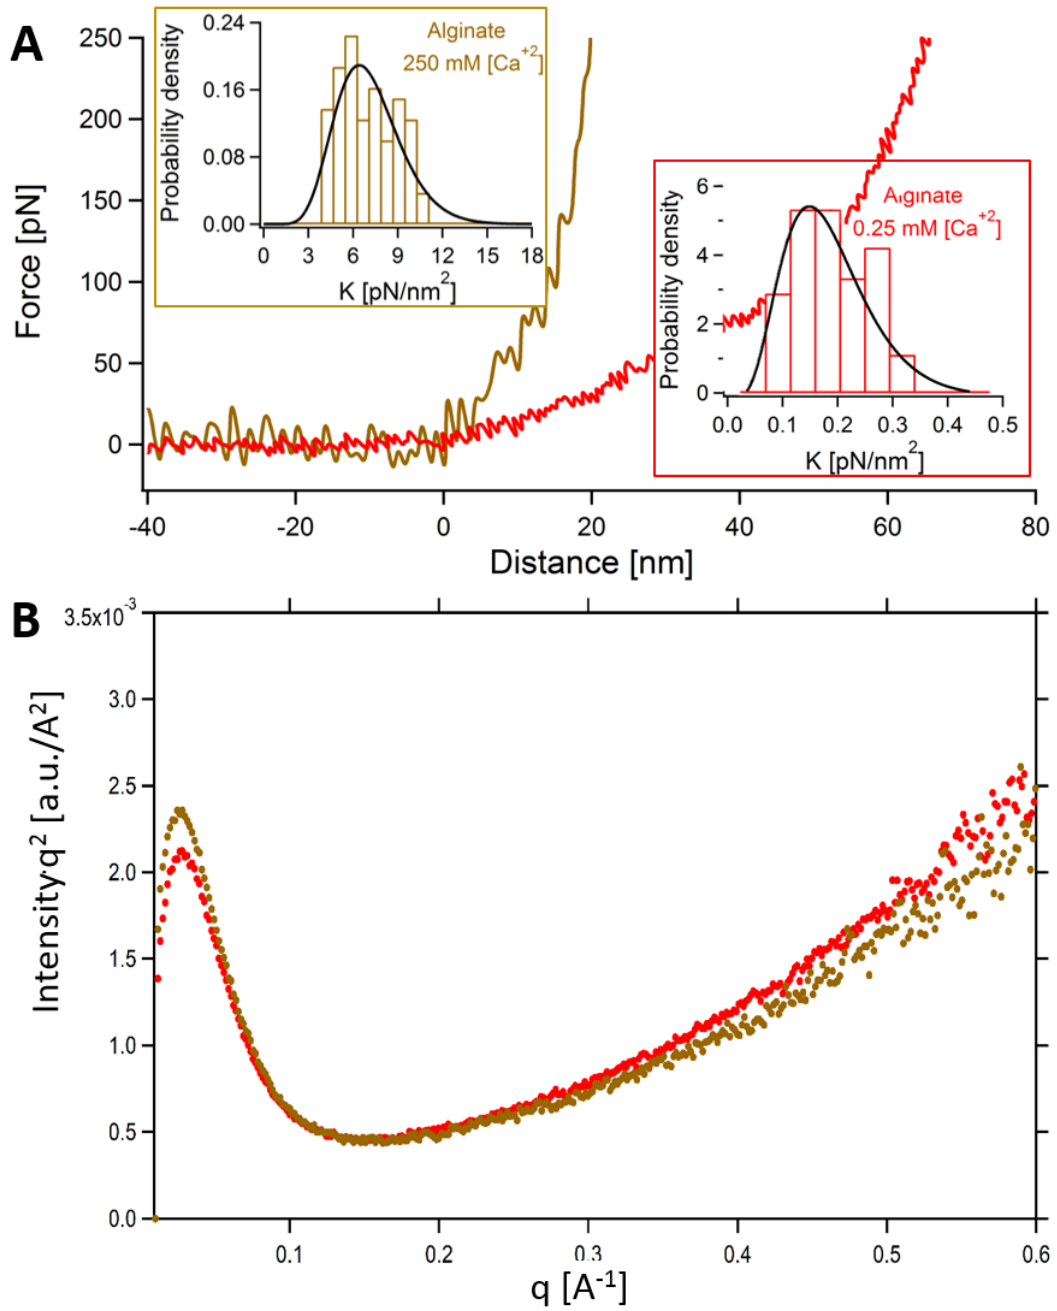

**Figure S4.** A. Nano-indentation force-distance curves of alginate hydrogels with different Ca<sup>2+</sup> concentrations in HEPES buffer. B. Kratky plots for alginate hydrogels with different Ca<sup>2+</sup> concentrations. 25 mM (red) and 250 mM (brown).
